# Supplementary material for: Technical note: Decomposing a time series into independent trend, seasonal and random components
Source: Copernicus journal article supplement (doi:10.5194/hess-2018-601), 2018-12-07
Supplement: Supplementary file 1 [file hess-2018-601-supplement.pdf]

## 1 **Supplementary Material**

2 This Supplementary Material contains Figures S1-S8.

3

4

5

6

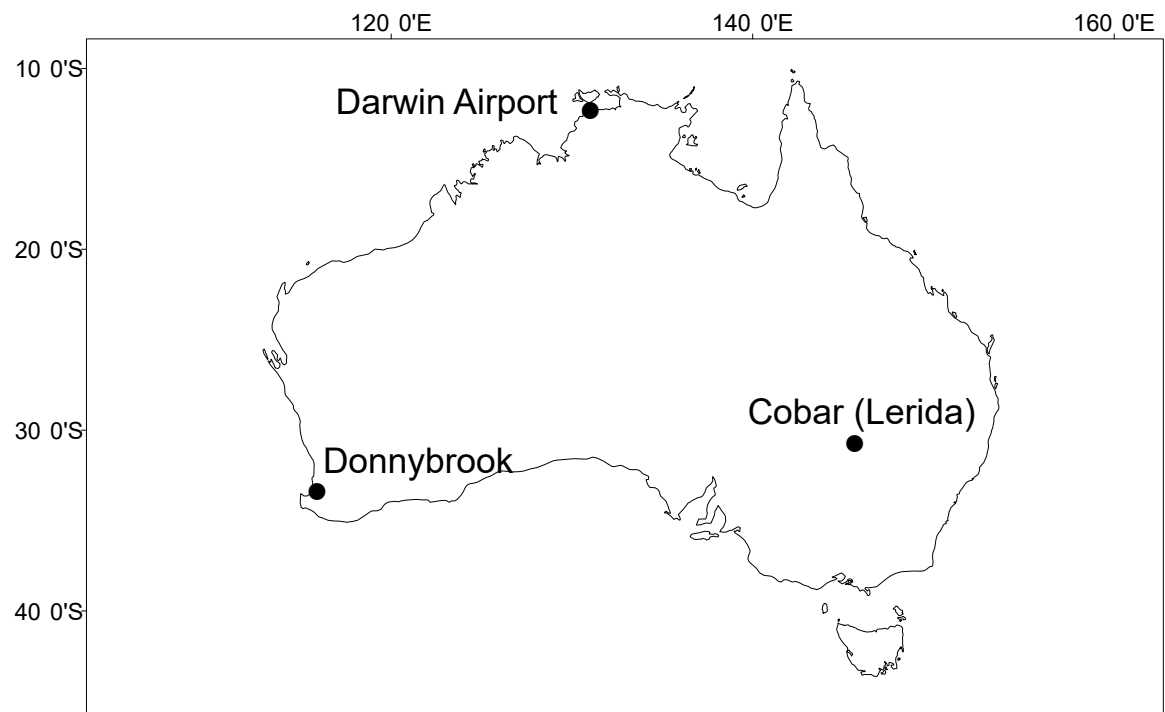

7

8 Figure S1. Location of precipitation observation sites used in this study.

9

10

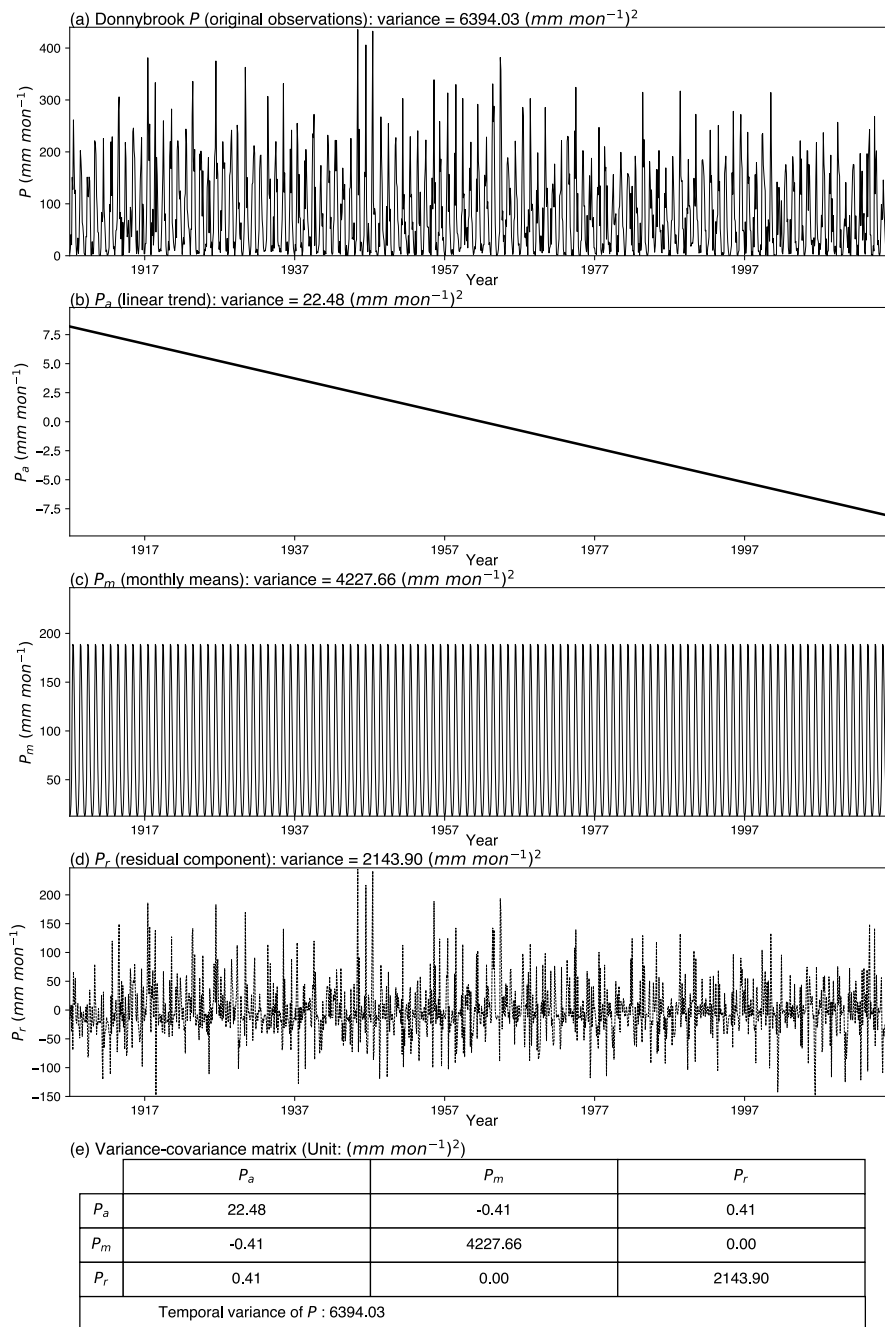

\*Note: The values along the diagonal of each line are variance values for three decomposed components, and other values are covariance values between the two crossed components.

11

12

Figure S2. Decomposition of monthly precipitation time series at Donnybrook (1907-2016) using linear trend removal. Panels

13

show the (a) original observations ( $P$ ), (b) linear trend ( $P_a$ ), (c) monthly means ( $P_m$ ), (d) residual random component ( $P_r$ ) and

14

the (e) variance-covariance matrix for the three components ( $P_a$ ,  $P_m$  and  $P_r$ ).

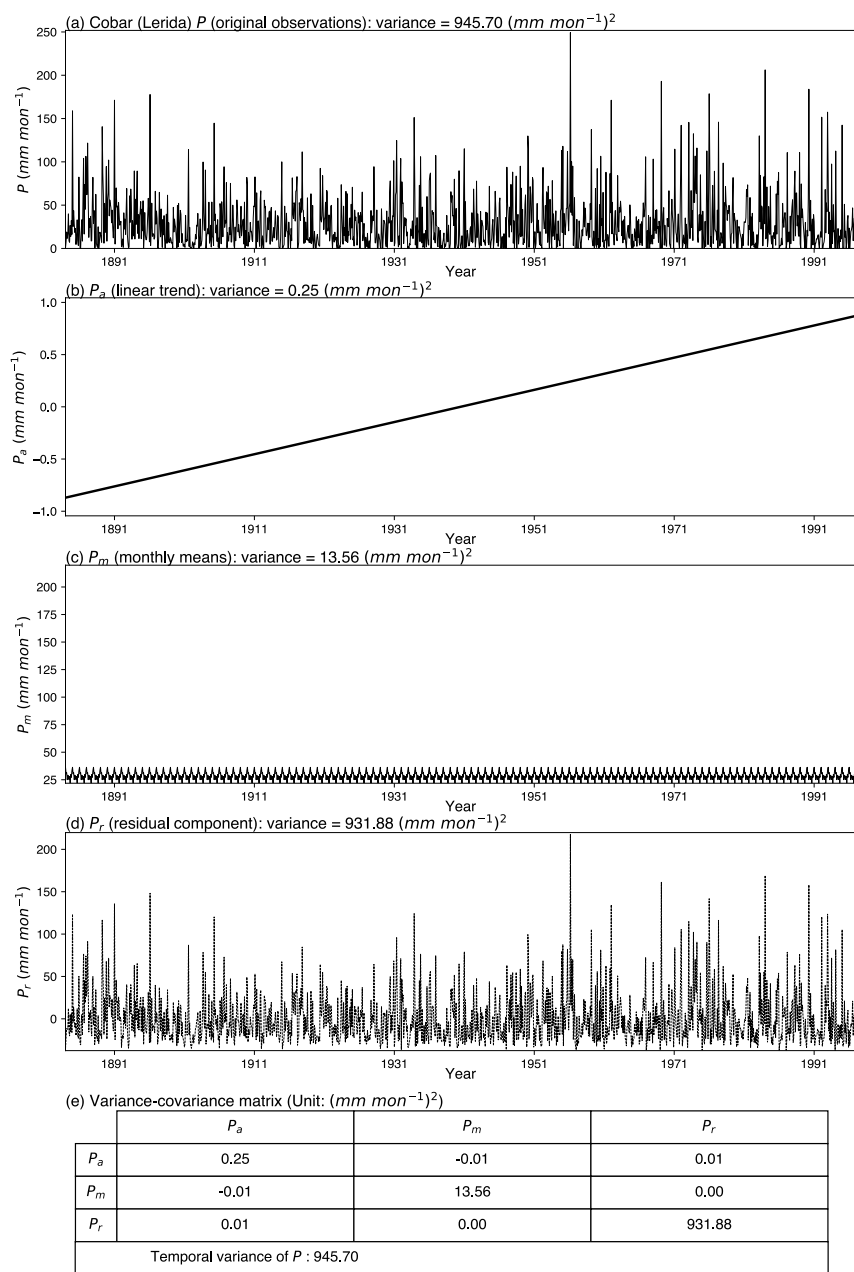

\*Note: The values along the diagonal of each line are variance values for three decomposed components, and other values are covariance values between the two crossed components.

15

16 Figure S3. Decomposition of monthly precipitation time series at Cobar (Lerida) (1884-1996) using linear trend removal.

17 Panels show the (a) original observations ( $P$ ), (b) linear trend ( $P_a$ ), (c) monthly means ( $P_m$ ), (d) residual random component

18 ( $P_r$ ) and the (e) variance-covariance matrix for the three components ( $P_a$ ,  $P_m$  and  $P_r$ ).

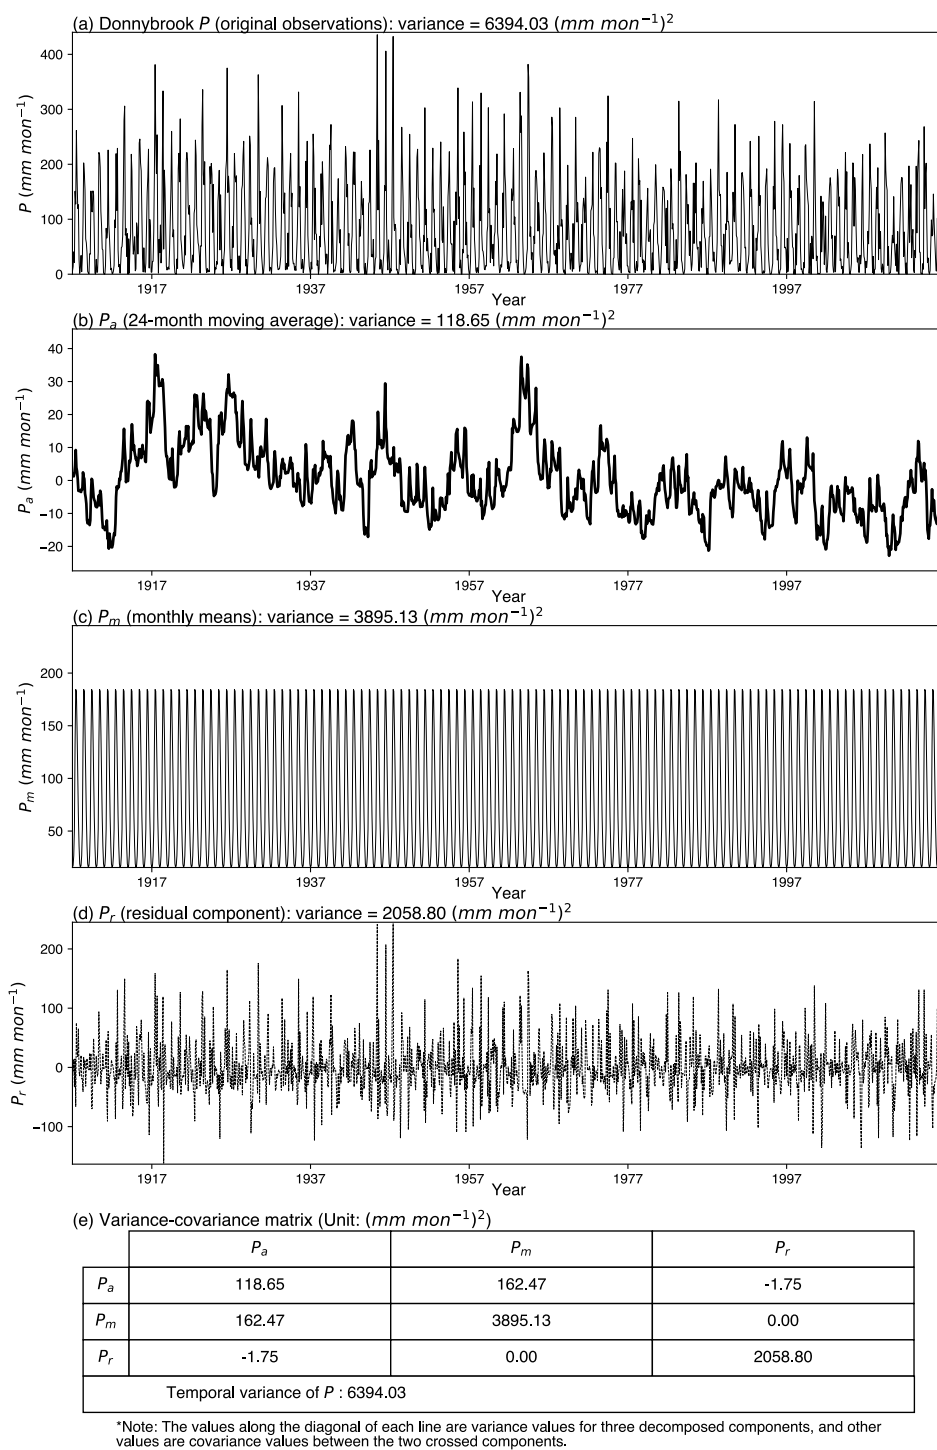

19

20 Figure S4. Decomposition of monthly precipitation time series at Donnybrook (1907-2016) using 24-month moving average  
 21 trend removal. Panels show the (a) original observations ( $P$ ), (b) 24-month moving average trend ( $P_a$ ), (c) monthly means ( $P_m$ ),  
 22 (d) residual random component ( $P_r$ ) and the (e) variance-covariance matrix for the three components ( $P_a$ ,  $P_m$  and  $P_r$ ).

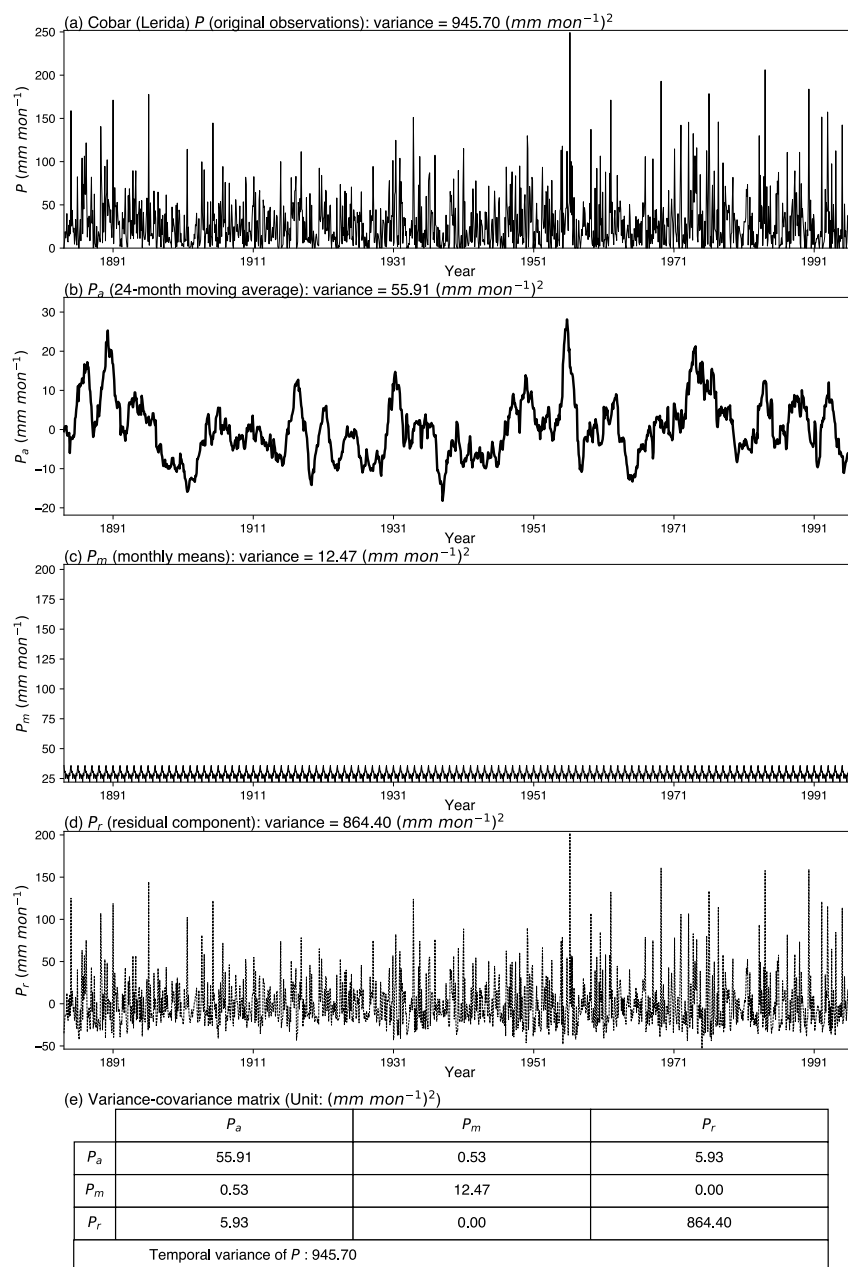

\*Note: The values along the diagonal of each line are variance values for three decomposed components, and other values are covariance values between the two crossed components.

23

24 Figure S5. Decomposition of monthly precipitation time series at Cobar (Lerida) (1884-1996) using 24-month moving average  
 25 trend removal. Panels show the (a) original observations ( $P$ ), (b) 24-month moving average trend ( $P_a$ ), (c) monthly means ( $P_m$ ),  
 26 (d) residual random component ( $P_r$ ), and the (e) variance-covariance matrix for the three components ( $P_a$ ,  $P_m$  and  $P_r$ ).

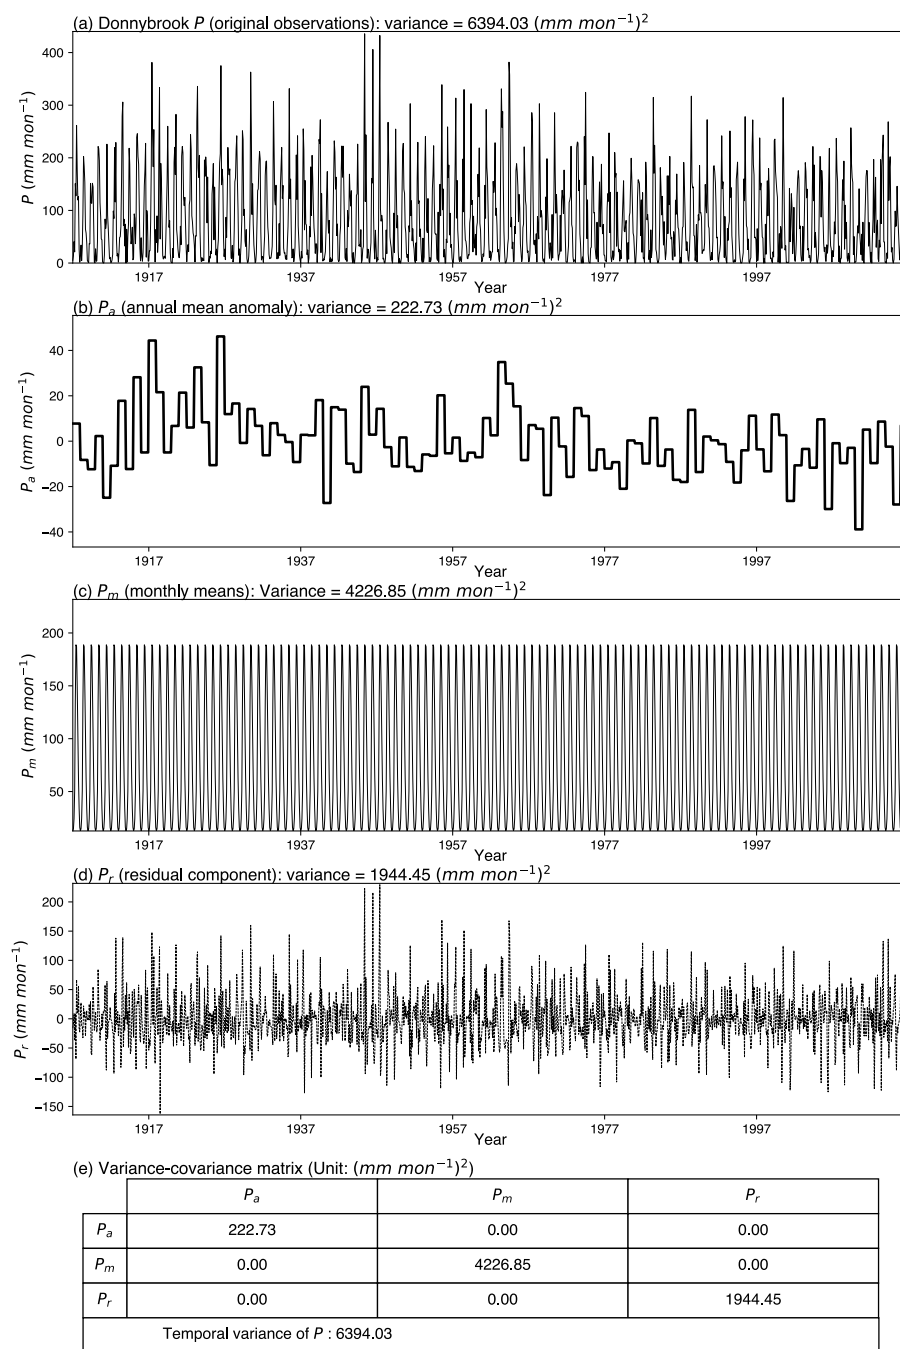

\*Note: The values along the diagonal of each line are variance values for three decomposed components, and other values are covariance values between the two crossed components.

27

28 Figure S6. Decomposition of monthly precipitation time series at Donnybrook (1907-2016) using the two-way ANOVA model.

29 Panels show the (a) original observations ( $P$ ), (b) annual anomaly ( $P_a$ ), (c) monthly means ( $P_m$ ), (d) residual random component

30 ( $P_r$ ) and the (e) variance-covariance matrix for the three components ( $P_a$ ,  $P_m$  and  $P_r$ ).

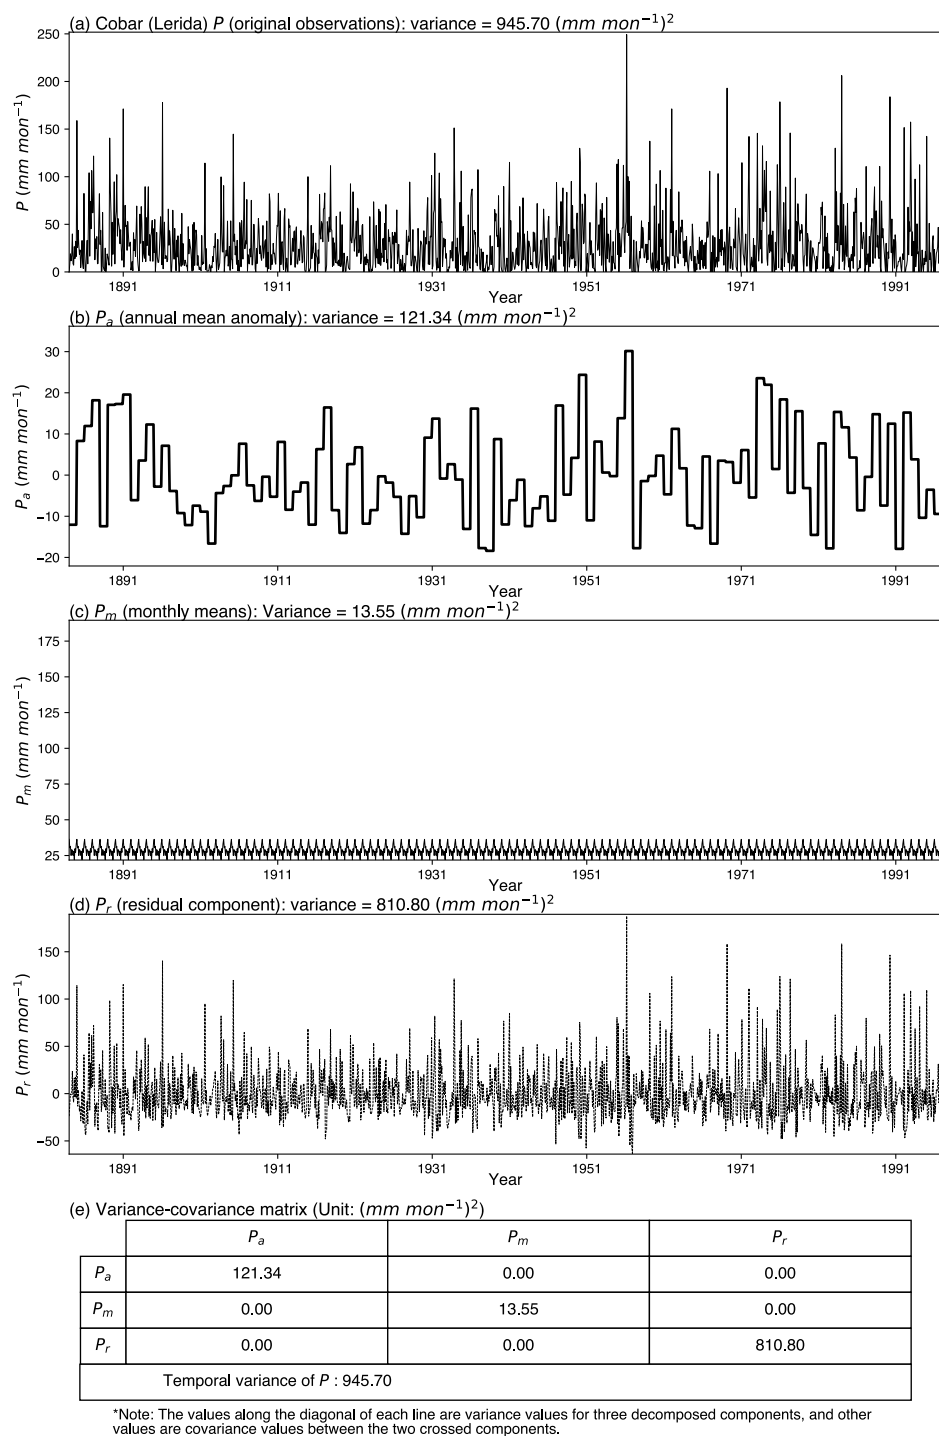

Figure S7. Decomposition of monthly precipitation time series at Cobar (Lerida) (1884-1996) using the two-way ANOVA model. Panels show the (a) original observations ( $P$ ), (b) annual anomaly ( $P_a$ ), (c) monthly means ( $P_m$ ), (d) residual random component ( $P_r$ ) and the (e) variance-covariance matrix for the three components ( $P_a$ ,  $P_m$  and  $P_r$ ).



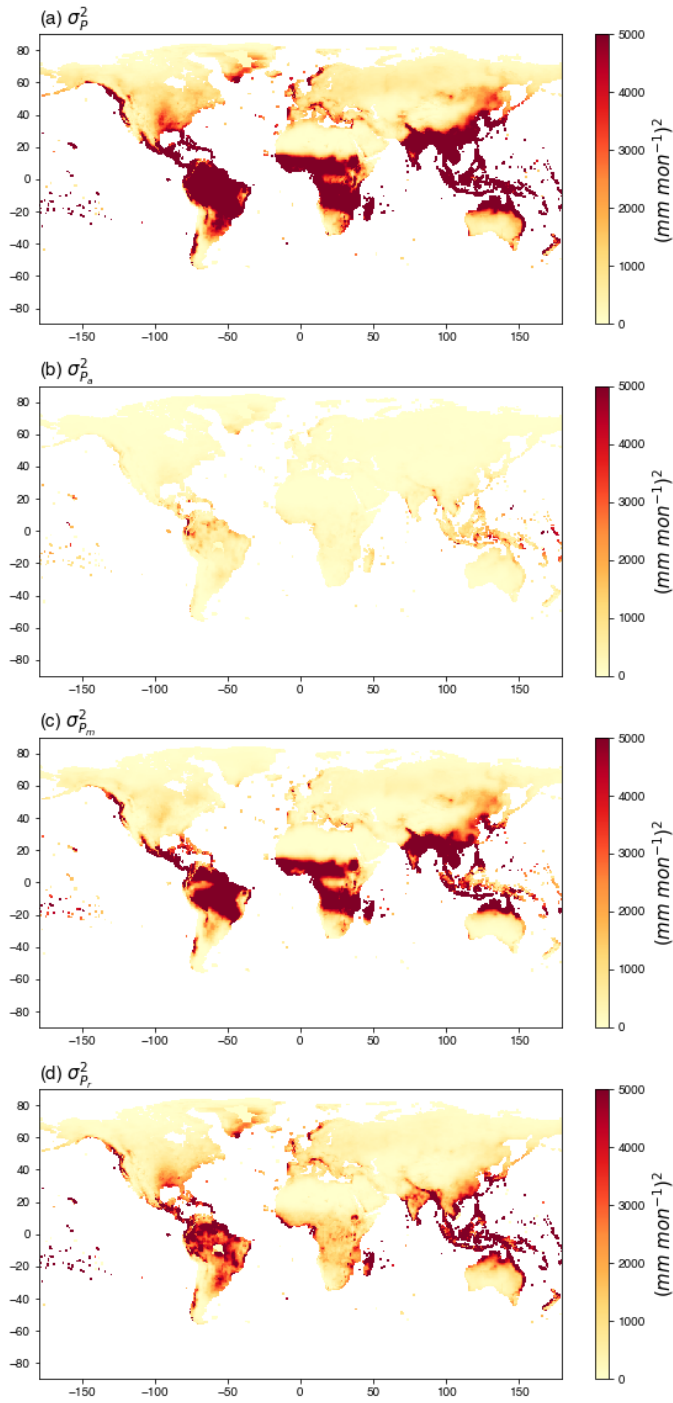

36

37

Figure S8. Temporal variance of global precipitation (a)  $\sigma_p^2$ , and variance of decomposed components, (b) annual anomaly  $\sigma_{p_a}^2$ ,

38

(c) monthly means  $\sigma_{p_m}^2$  and (d) residual component  $\sigma_{p_r}^2$  based on the two-way ANOVA model.
