# Supplementary material for: Technical note: Decomposing a time series into independent trend, seasonal and random components
Source: Copernicus journal article supplement (doi:10.5194/hess-2018-601), 2018-12-07
Supplement: Supplementary file [file hess-2018-601-AC4-supplement.pdf]

**In the following we use R2C1 (etc) to refer to comment 1 (C1) by reviewer 2 (R2).**

**Dr. S. Patidar**

R2C10: Dear Author

Thanks, You pointed it out right. I hope you must understand algebra and sign rules for operating the bracket. To cancel  $P(t)$  you need to enclose the third and fourth term within the brackets.

Response: Yes, we agree that it is better to understand the cancellation of  $P(t)$  by adding brackets around the third and fourth terms. Thanks for your suggestion.
